# Supplementary material for: Lipoprotein(a) plasma levels are not associated with incident microvascular complications in type 2 diabetes mellitus
Source: PubMed Central journal article supplement (PMC7228906; doi:10.1007/s00125-020-05120-9), 2020-03-09

## ESM:

ESM Table 1: Post-hoc power analyses

|                                                   | <b>Power</b> | <b>HR</b> |
|---------------------------------------------------|--------------|-----------|
| Lp(a) binary predictor (prevalent analyses)       | 80 %         | 1.4 *     |
| Lp(a) binary predictor (prospective analyses)     | 80 %         | 1.5       |
| Lp(a) continuous predictor (prevalent analyses)   | 80 %         | 1.09*     |
| Lp(a) continuous predictor (prospective analyses) | 80 %         | 1.013     |
| rs3798220                                         | 80 %         | 1.7       |
| rs10455872                                        | 80 %         | 1.7       |

\* OR

ESM Table 2: Lp(a) median concentrations according to microvascular complication

| <b>Baseline</b>             | <b>Retinopathy (present, n=298)</b> | <b>Retinopathy (absent, n=1480)</b> | <b>P value</b> |
|-----------------------------|-------------------------------------|-------------------------------------|----------------|
| Lp(a) median, IQR, (mg/dl)  | 10 (5.83-26.25)                     | 11 (5-33)                           | 0.86           |
|                             | <b>Nephropathy (present, n=375)</b> | <b>Nephropathy (absent, n=1309)</b> |                |
| Lp(a), median, IQR, (mg/dl) | 10 (4.7-31.4)                       | 11.1 (5-31.75)                      | 0.15           |
|                             | <b>Neuropathy (present, n=223)</b>  | <b>Neuropathy (absent, n=539)</b>   |                |
| Lp(a) median, IQR, (mg/dl)  | 10.90 (5.00-28.00)                  | 11 (4.85-31.00)                     | 0.84           |
| <b>Follow-up</b>            | <b>Retinopathy (present, n=223)</b> | <b>Retinopathy (absent, n=1180)</b> |                |
| Lp(a) median, IQR, (mg/dl)  | 12 (5-35)                           | 11 (5-32.85)                        | 0.85           |
|                             | <b>Nephropathy (present, n=246)</b> | <b>Nephropathy (absent, 1005)</b>   |                |
| Lp(a), median, IQR, (mg/dl) | 11 (4.78-11)                        | 11.25 (5-31)                        | 0.62           |
|                             | <b>Neuropathy (present, n=236)</b>  | <b>Neuropathy (absent, n=256)</b>   |                |
| Lp(a) median, IQR, (mg/dl)  | 11 (4-29.75)                        | 11 (5-29)                           | 0.84           |

Median (IQR) are given, P values were obtained using Mann-Whitney test

ESM Table 3: Odds ratio for prevalent microvascular complications for patients with Lp(a) concentrations  $\geq 30$  mg/dL compared to those below 30 mg/dL (=reference group). n, numbers of patients who developed the complication.

|                          | <b>Model 1 OR, 95% CI</b> | <b>P-value</b> | <b>Model 2, 95% CI</b> | <b>P-value</b> |
|--------------------------|---------------------------|----------------|------------------------|----------------|
| <b>Retinopathy n=231</b> |                           |                |                        |                |
| $\geq 30$ mg/dl          | 0.89 (0.66-1.19)          | 0.43           | 0.98 (0.68-1.43)       | 0.93           |
| <b>Nephropathy n=302</b> |                           |                |                        |                |
| $\geq 30$ mg/dl          | 1.06 (0.81-1.39)          | 0.66           | 1.11 (0.81-1.52)       | 0.52           |
| <b>Neuropathy n=177</b>  |                           |                |                        |                |
| $\geq 30$ mg/dl          | 0.96 (0.66-1.40)          | 0.84           | 0.98 (0.64-1.50)       | 0.92           |

(n=number of events, CI; confidence intervals)

Model 1: adjusted sex and age;

Model 2 additionally adjusted MAP, Non-HDL-cholesterol, HDL cholesterol, BMI, duration of type 2 diabetes, HbA1c and smoking (never/former/current)

ESM Table 4 : OR's and HR's for microvascular complications per increasing 1 mg/dl Lp(a) concentration. n, numbers of patients who developed the complication.

|                      | <b>Model 1, 95% CI</b> | <b>P-value</b> | <b>Model 2, 95% CI</b> | <b>P-value</b> |
|----------------------|------------------------|----------------|------------------------|----------------|
| <b>Baseline</b>      |                        |                |                        |                |
| Retinopathy (n=231)  | 0.998 (0.994-1.001)    | 0.16           | 0.999 (0.995-1.004)    | 0.79           |
| Nephropathy (n= 302) | 0.999 (0.996-1.002)    | 0.67           | 1.000 (0.997-1.004)    | 0.98           |
| Neuropathy (n= 177)  | 0.999 (0.995-1.003)    | 0.69           | 1.000 (0.995-1.005)    | 0.92           |
| <b>Follow-up</b>     |                        |                |                        |                |
| Retinopathy (n=183)  | 1.000 (0.997-1.003)    | 0.30           | 1.001 (0.997-1.004)    | 0.72           |
| Nephropathy (n= 185) | 0.999 (0.996-1.002)    | 0.48           | 0.999(0.995-1.003)     | 0.60           |
| Neuropathy (n=202)   | 1.000 (0.996-1.003)    | 0.79           | 0.999 (0.994-1.003)    | 0.55           |

n= number of events

Model 1: adjusted sex and age

Model 2 additionally adjusted for MAP, Non-HDL-cholesterol, HDL cholesterol, BMI, duration of type 2 diabetes, HbA1c and smoking (never/former/current)

ESM Table 5 : OR's and HR's for prevalent and incident microvascular complications, respectively, by quartiles of Lp(a) concentrations concentration  $\leq 25^{\text{th}}$  percentile ( $\leq 5\text{mg/dL}$  (=reference group),  $>25^{\text{th}} \leq 50^{\text{th}}$  percentile ( $>5\text{mg/dl} \leq 11 \text{ mg/dl}$ ),  $>50^{\text{th}} \leq 75^{\text{th}}$  percentile ( $>11 \text{ mg/dl} \leq 31.55 \text{ mg/dl}$ ),  $>75^{\text{th}} \leq 100^{\text{th}}$  percentile ( $>31.55 \text{ mg/dl}$ ). n, numbers of patients who developed the complication.

| <b>Baseline</b>                                          | <b>Model 1, 95% CI</b> | <b>P-value</b> | <b>Model 2, 95% CI</b> | <b>P-value</b> |
|----------------------------------------------------------|------------------------|----------------|------------------------|----------------|
| <b>Retinopathy, n=231</b>                                |                        |                |                        |                |
| $>25^{\text{th}} \leq 50^{\text{th}}$ percentile (n= 86) | 1.53 (1.08-2.17)       | 0.02           | 1.33 (0.86-2.06)       | 0.20           |
| $>50^{\text{th}} \leq 75^{\text{th}}$ percentile (n=73)  | 1.27 (0.89-1.82)       | 0.19           | 1.12 (0.71-1.76)       | 0.63           |
| $>75^{\text{th}} \leq 100^{\text{th}}$ percentile (n=67) | 1.09 (0.76-1.57)       | 0.65           | 1.15 (0.73-1.82))      | 0.54           |
|                                                          |                        |                |                        |                |
| <b>Nephropathy, n=302</b>                                |                        |                |                        |                |
| $>25^{\text{th}} \leq 50^{\text{th}}$ percentile (n=100) | 1.11 (0.80-1.53)       | 0.55           | 0.95 (0.65-1.37)       | 0.78           |
| $>50^{\text{th}} \leq 75^{\text{th}}$ percentile (n=75)  | 0.79 (0.56-1.11)       | 0.17           | 0.74 (0.50-1.09)       | 0.13           |
| $>75^{\text{th}} \leq 100^{\text{th}}$ percentile (n=93) | 1.02 (0.74-1.41)       | 0.91           | 1.01 (0.70-1.48)       | 0.94           |
|                                                          |                        |                |                        |                |
| <b>Neuropathy, n=177</b>                                 |                        |                |                        |                |
| $>25^{\text{th}} \leq 50^{\text{th}}$ percentile (n=58)  | 1.12 (0.72-1.76)       | 0.61           | 0.96 (0.58-1.58)       | 0.86           |
| $>50^{\text{th}} \leq 75^{\text{th}}$ percentile (n=55)  | 1.11 (0.70-1.75)       | 0.66           | 0.88 (0.52-1.48)       | 0.62           |
| $>75^{\text{th}} \leq 100^{\text{th}}$ percentile (n=53) | 1.02 (0.65-1.61)       | 0.93           | 0.96 (0.57-1.61)       | 0.88           |
|                                                          |                        |                |                        |                |
| <b>Follow-up</b>                                         | <b>Model 1, 95% CI</b> | <b>P-value</b> | <b>Model 2, 95% CI</b> | <b>P-value</b> |
| <b>Retinopathy ,n=183</b>                                |                        |                |                        |                |
| $>25^{\text{th}} \leq 50^{\text{th}}$ percentile (n=45)  | 0.79 (0.54-1.15)       | 0.22           | 0.66 (0.43-1.02)       | 0.06           |
| $>50^{\text{th}} \leq 75^{\text{th}}$ percentile (n=58)  | 1.11 (0.77-1.58)       | 0.58           | 1.18 (0.79-1.74)       | 0.42           |
| $>75^{\text{th}} \leq 100^{\text{th}}$ percentile (n=56) | 0.90 (0.63-1.29)       | 0.56           | 0.93 (0.62-1.40)       | 0.73           |
|                                                          |                        |                |                        |                |
| <b>Nephropathy, n=185</b>                                |                        |                |                        |                |
| $>25^{\text{th}} \leq 50^{\text{th}}$ percentile (n=59)  | 0.93 (0.66-1.32)       | 0.69           | 0.96 (0.65-1.43)       | 0.84           |
| $>50^{\text{th}} \leq 75^{\text{th}}$ percentile (n=57)  | 0.87 (0.61-1.25)       | 0.45           | 0.84 (0.55-1.29)       | 0.43           |
| $>75^{\text{th}} \leq 100^{\text{th}}$ percentile (n=63) | 1.00 (0.72-1.41)       | 0.99           | 1.02 (0.68-1.52)       | 0.94           |
|                                                          |                        |                |                        |                |
| <b>Neuropathy, n=202</b>                                 |                        |                |                        |                |
| $>25^{\text{th}} \leq 50^{\text{th}}$ percentile (n=53)  | 0.93 (0.65-1.42)       | 0.67           | 0.80 (0.54-1.16)       | 0.24           |
| $>50^{\text{th}} \leq 75^{\text{th}}$ percentile (n=57)  | 0.99 (0.69-1.41)       | 0.95           | 0.80 (0.55-1.17)       | 0.25           |
| $>75^{\text{th}} \leq 100^{\text{th}}$ percentile (n=56) | 0.92 (0.65-1.32)       | 0.66           | 0.80 (0.54-1.20)       | 0.28           |

Model 1: adjusted sex and age

Model 2 additionally adjusted for MAP, Non-HDL-cholesterol, HDL cholesterol, BMI, duration of type 2 diabetes, HbA1c and smoking (never/former/current)

ESM Table 6: The association of % difference eGFR with Lp(a) concentration

|                                                                     | Model 1 beta, 95% CI  | P-value | Model 2 beta, 95% CI  | P-value |
|---------------------------------------------------------------------|-----------------------|---------|-----------------------|---------|
| <b>Lp(a) as binary covariate, &lt;30mg/dl as reference, n= 1713</b> |                       |         |                       |         |
| % difference eGFR MDRD (ml/min/1.73 m <sup>2</sup> ) <sup>b</sup>   | -0.597 (-3.211-2.017) | 0.654   | -0.316 (-3,156-2.525) | 0.828   |
| <b>Lp(a) continuous, n= 1713</b>                                    |                       |         |                       |         |
| % difference eGFR MDRD (ml/min/1.73 m <sup>2</sup> ) <sup>b</sup>   | 0.005 (-0.022-0.032)  | 0.706   | 0.012 (-0.018-0.042)  | 0.433   |

n= available for analyses, CI: confidence intervals

Model 1: adjusted sex and age

Model 2 additionally adjusted for MAP, Non-HDL-cholesterol, HDL cholesterol, BMI, duration of type 2 diabetes, HbA1c and smoking (never/former/current)

ESM Table 7: Hazard ratios for microvascular complications according to the additive genetic model for rs10455872 and rs3798220, n: numbers of patients who developed the complication.

|                    | Model 1 HR | 95% CI    | P-value | Model 2 HR | 95% CI    | P-value |
|--------------------|------------|-----------|---------|------------|-----------|---------|
| <b>Retinopathy</b> |            |           |         |            |           |         |
| rs10455872, n=173  | 0.90       | 0.61-1.33 | 0.59    | 1.07       | 0.70-1.64 | 0.75    |
| rs3798220, n= 165  | 1.19       | 0.59-2.41 | 0.64    | 1.57       | 0.73-3.36 | 0.25    |
| <b>Nephropathy</b> |            |           |         |            |           |         |
| rs10455872, n=174  | 1.17       | 0.82-1.67 | 0.38    | 1.21       | 0.78-1.86 | 0.40    |
| rs3798220, n=166   | 0.85       | 0.35-2.06 | 0.72    | 0.71       | 0.23-2.24 | 0.56    |
| <b>Neuropathy</b>  |            |           |         |            |           |         |
| rs10455872, n=176  | 1.39       | 0.97-1.98 | 0.07    | 1.17       | 0.73-1.88 | 0.50    |
| rs3798220, n=175   | 0.52       | 0.19-1.40 | 0.19    | 0.59       | 0.23-1.58 | 0.29    |

Model 1: adjusted sex and age;

Model 2 additionally adjusted MAP, Non-HDL-cholesterol, HDL cholesterol, BMI, duration of type 2 diabetes, HbA1c and smoking (never/former/current)

ESM Table 8: Hazard ratios for incident microvascular complications according to the continuous genetic risk score (rs10455872 and rs3798220, reference =0)

|                           | Model 1 HR, 95% CI | P-value | Model 2 HR, 95% CI | P-value |
|---------------------------|--------------------|---------|--------------------|---------|
| <b>Retinopathy, n=163</b> |                    |         |                    |         |
| Genetic risk score        | 0.91 (0.69-1.21)   | 0.52    | 1.20 (0.83-1.75)   | 0.34    |
| <b>Nephropathy, n=203</b> |                    |         |                    |         |
| Genetic risk score        | 1.16 (0.83-1.62)   | 0.39    | 1.15 (0.77-1.73)   | 0.49    |
| <b>Neuropathy, n=172</b>  |                    |         |                    |         |
| Genetic risk score        | 1.22 (0.87-1.72)   | 0.25    | 1.03 (0.68-1.58)   | 0.88    |

Model 1: adjusted sex and age;

Model 2 additionally adjusted MAP, Non-HDL-cholesterol, HDL cholesterol, BMI, duration of type 2 diabetes, HbA1c and smoking (never/former/current)

ESM Fig. 1: Spline curves with 95 % confidence bands for the association between log-transformed Lp(a) mg/dl and OR of each prevalent microvascular endpoints. Model 1 Spline curves adjusted for sex and age; Model 2 additionally adjusted for MAP, Non-HDL-cholesterol, HDL cholesterol, BMI, duration of type 2 diabetes, HbA1c and smoking(never/former/current)

(a) Retinopathy n=231, (b) Nephropathy n=302, (c) Neuropathy n= 177 (n=number of events)

**a**

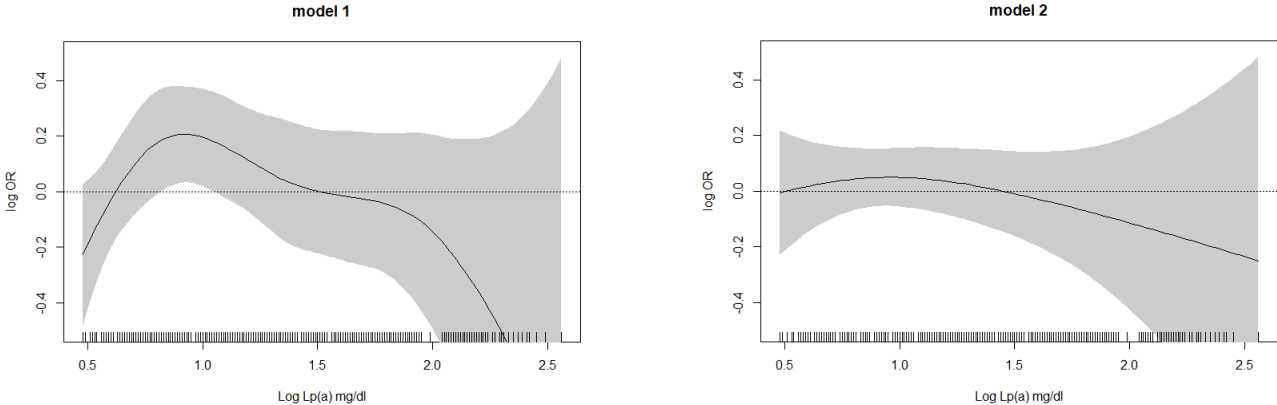

**b**

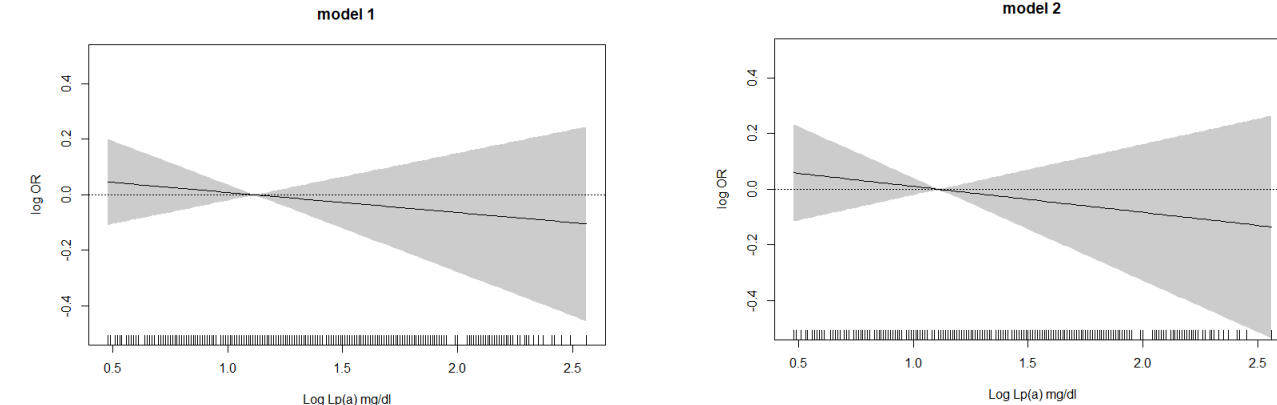

**c**

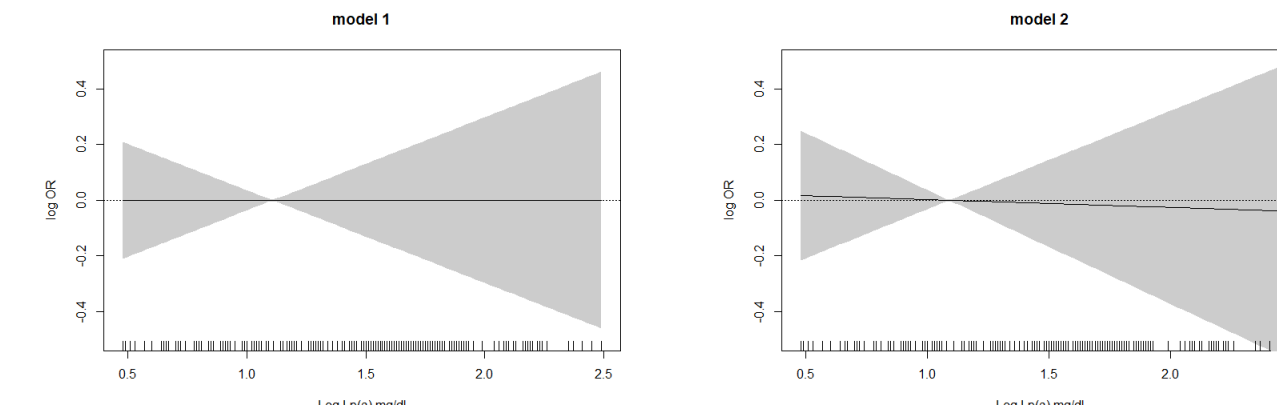

ESM Fig. 2: Spline curves with 95 % confidence bands for the association between log-transformed Lp(a) mg/dl and HR of each incident microvascular endpoints. Model 1 Spline curves adjusted for sex and age; Model 2 additionally adjusted for MAP, Non-HDL-cholesterol, HDL cholesterol, BMI, duration of type 2 diabetes, HbA1c and smoking(never/former/current)

(a) Retinopathy n=183, (b) Nephropathy n=185, (c) Neuropathy n=202 (n= number of events)

**a**

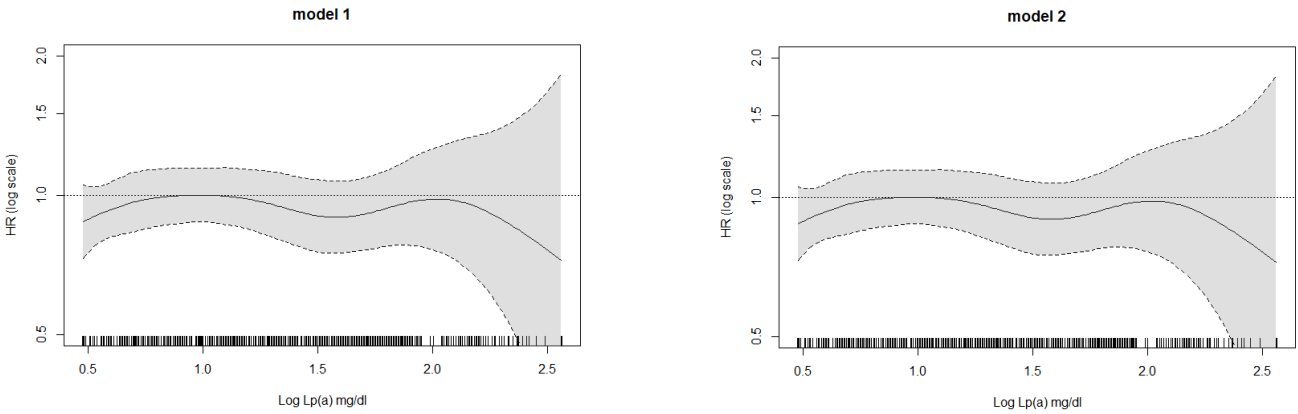

**b**

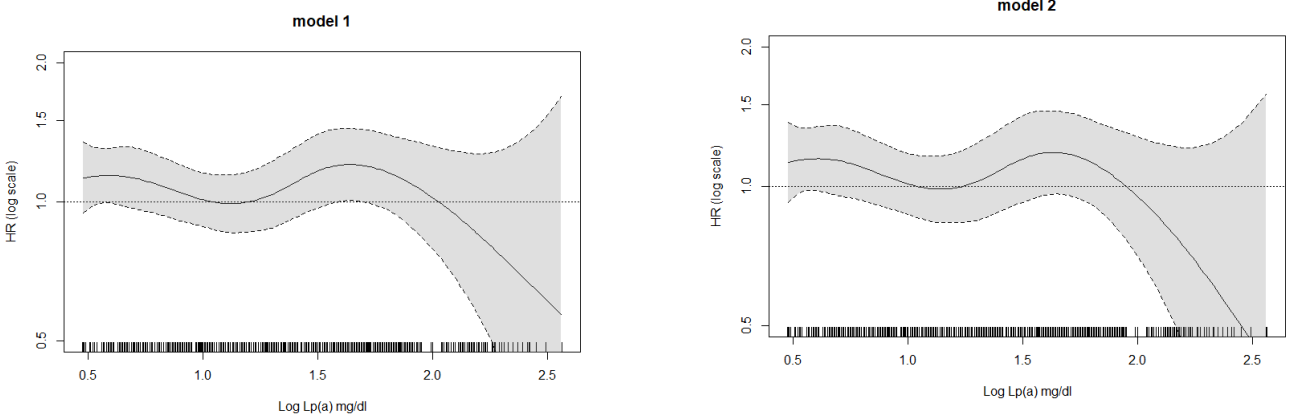

**c**

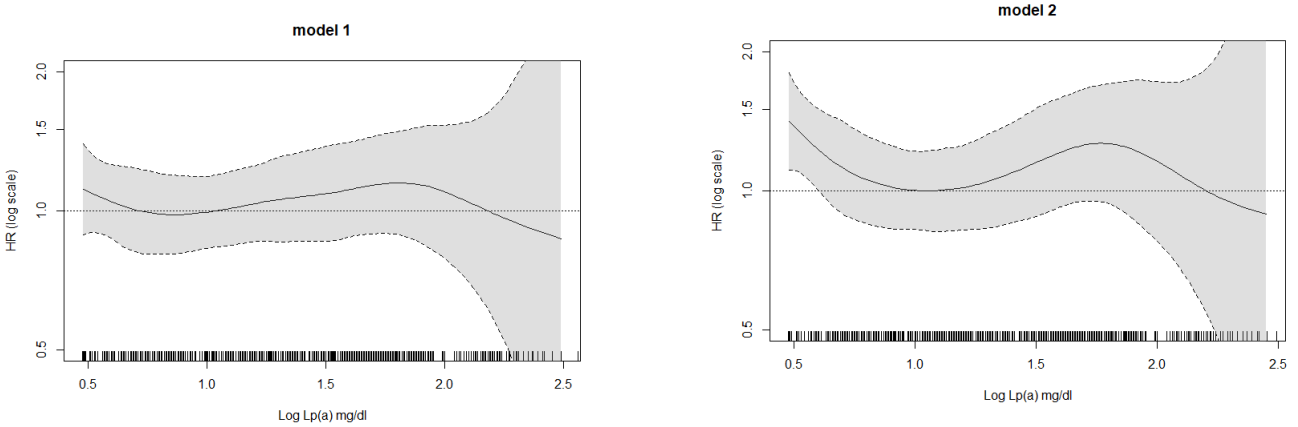

Supplement: 125_2020_5120_MOESM1_ESM.pdf [file 125_2020_5120_MOESM1_ESM.pdf]
